# Supplementary material for: Elevated recombinant clyA gene expression in the uropathogenic Escherichia coli strain 536, a clue to explain pathoadaptive mutations in a subset of extraintestinal E. coli strains
Source: PubMed Central journal article supplement (PMC4164713; doi:10.1186/s12866-014-0216-4), 2014-09-02
Supplement: 12866_2014_216_MOESM1_ESM.pdf [file 12866_2014_216_MOESM1_ESM.pdf]

|                     | 10                                                            | 20 | 30 | 40 | 50 | 60 |
|---------------------|---------------------------------------------------------------|----|----|----|----|----|
| MG1655 (1229483) .. | GGCTATCAATATTTGTCGCTGCATAGGCTGCTGATTTTTTCGTTCTCTTATCTTGTGCTCA |    |    |    |    |    |
| MDS42               | GGCTATCAATATTTGTCGCTGCATAGGCTGCTGATTTTTTCGTTCTCTTATCTTGTGCTCA |    |    |    |    |    |
| W3110               | GGCTATCAATATTTGTCGCTGCATAGGCTGCTGATTTTTTCGTTCTCTTATCTTGTGCTCA |    |    |    |    |    |
| DH1                 | GGCTATCAATATTTGTCGCTGCATAGGCTGCTGATTTTTTCGTTCTCTTATCTTGTGCTCA |    |    |    |    |    |
| ETEC                | GGCTATCAATATTTGTCGCTGCATAGGCTGCTGATTTTTTCGTTCTCTTATCTTGTGCTCA |    |    |    |    |    |
| P12b                | GGCTATCAATATTTGTCGCTGCATAGGCTGCTGATTTTTTCGTTCTCTTATCTTGTGCTCA |    |    |    |    |    |
| BW2952              | GGCTATCAATATTTGTCGCTGCATAGGCTGCTGATTTTTTCGTTCTCTTATCTTGTGCTCA |    |    |    |    |    |
| DH10B               | GGCTATCAATATTTGTCGCTGCATAGGCTGCTGATTTTTTCGTTCTCTTATCTTGTGCTCA |    |    |    |    |    |
| C321                | GGCTATCAATATTTGTCGCTGCATAGGCTGCTGATTTTTTCGTTCTCTTATCTTGTGCTCA |    |    |    |    |    |
| Wxxxxx20            | GGCTATCAATATTTGTCGCTGCATAGACTGCTGATTTTTTCGTTCTCTTATCTTGTGCTCA |    |    |    |    |    |
| KO11FL              | GGCTATCAATATTTGTCGCTGCATAGACTGCTGATTTTTTCGTTCTCTTATCTTGTGCTCA |    |    |    |    |    |
| LY180x19            | GGCTATCAATATTTGTCGCTGCATAGACTGCTGATTTTTTCGTTCTCTTATCTTGTGCTCA |    |    |    |    |    |
| E24377A             | GGCTATCAATATTTGTCGCTGCATAGACTGCTGATTTTTTCGTTCTCTTATCTTGTGCTCA |    |    |    |    |    |
| SE11xx14            | GGCTATCAATATTTGTCGCTGCATAGACTGCTGATTTTTTCGTTCTCTTATCTTGTGCTCA |    |    |    |    |    |
| 2009EL              | GGCTATCAATATTTGTCGCTGCATAGACTGCTGATTTTTTCGTTCTCTTATCTTGTGCTCA |    |    |    |    |    |
| 2011C_3493          | GGCTATCAATATTTGTCGCTGCATAGACTGCTGATTTTTTCGTTCTCTTATCTTGTGCTCA |    |    |    |    |    |
| 55989x18            | GGCTATCAATATTTGTCGCTGCATAGACTGCTGATTTTTTCGTTCTCTTATCTTGTGCTCA |    |    |    |    |    |
| IAI1xx13            | GGCTATCAATATTTGTCGCTGCATAGACTGCTGATTTTTTCGTTCTCTTATCTTGTGCTCA |    |    |    |    |    |
| O103H2              | GGCTATCAATATTTGTCGCTGCATAGACTGCTGATTTTTTCGTTCTCTTATCTTGTGCTCA |    |    |    |    |    |
| APECxx11            | GGCTATCAATATTTGTCGCTGCATAGACTGCTGATTTTTTCGTTCTCTTATCTTGTGCTCA |    |    |    |    |    |
| UMNK88              | GGCTATCAATATTTGTCGCTGCATAGACTGCTGATTTTTTCGTTCTCTTATCTTGTGCTCA |    |    |    |    |    |
| HSxxxx39            | GGCTATCAATATTTGTCGCTGCATAGACTGCTGATTTTTTCGTTCTCTTATCTTGTGCTCA |    |    |    |    |    |
| BL21DE3             | GGCTATCAATATTTGTCGCTGCATAGACTGCTGATTTTTTCGTTCTCTTATCTTGTGCTCA |    |    |    |    |    |
| REL606              | GGCTATCAATATTTGTCGCTGCATAGACTGCTGATTTTTTCGTTCTCTTATCTTGTGCTCA |    |    |    |    |    |
| BL21_GoldDE3pLysS   | GGCTATCAATATTTGTCGCTGCATAGACTGCTGATTTTTTCGTTCTCTTATCTTGTGCTCA |    |    |    |    |    |
| ATCCxx37            | GGCTATCAATATTTGTCGCTGCATAGACTGCTGATTTTTTCGTTCTCTTATCTTGTGCTCA |    |    |    |    |    |
| O111H               | GGCTATCAATATTTGTCGCTGCATAGACTGCTGATTTTTTCGTTCTCTTATCTTGTGCTCA |    |    |    |    |    |
| O26H11              | GGCTATCAATATTTGTCGCTGCATAGACTGCTGATTTTTTCGTTCTCTTATCTTGTGCTCA |    |    |    |    |    |
| UMN026              | GGCTATCAATATTTGTCGCTGCATAGACTGCTGATTTTTTCGTTCTCTTATCTTGTGCTCA |    |    |    |    |    |
| 042NC_0176261       | GGCTATCAATATTTGTCGCTGCATAGACTGCTGATTTTTTCGTTCTCTTATCTTGTGCTCA |    |    |    |    |    |
| IAI39x23            | GGCTATCAATATTTGTCGCTGCATAGACTGCTGATTTTTTCGTTCTCTTATCTTGTGCTCA |    |    |    |    |    |
| O7K1xx29            | GGCTATCAATATTTGTCGCTGCATAGACTGCTGATTTTTTCGTTCTCTTATCTTGTGCTCA |    |    |    |    |    |
| SMS_3_5             | GGCTATCAATATTTGTCGCTGCATAGACTGCTGATTTTTTCGTTATCTTATCTTGTGCTCA |    |    |    |    |    |
| RM12579             | GGCTATCAATATTTGTCGCTGCATAGACTGCTGATTTTTTCGTTCTCTTATCTTGTGCTCA |    |    |    |    |    |
| CB9615              | GGCTATCAATATTTGTCGCTGCATAGACTGCTGATTTTTTCGTTCTCTTATCTTGTGCTCA |    |    |    |    |    |
| Xuzhou21            | GGCTATCAATATTTGTCGCTGCATAGACTGCTGATTTTTTCGTTCTCTTATCTTGTGCTCA |    |    |    |    |    |
| TW14359             | GGCTATCAATATTTGTCGCTGCATAGACTGCTGATTTTTTCGTTCTCTTATCTTGTGCTCA |    |    |    |    |    |
| EC4115              | GGCTATCAATATTTGTCGCTGCATAGACTGCTGATTTTTTCGTTCTCTTATCTTGTGCTCA |    |    |    |    |    |
| EDL933              | GGCTATCAATATTTGTCGCTGCATAGACTGCTGATTTTTTCGTTCTCTTATCTTGTGCTCA |    |    |    |    |    |
| Sakaix28            | GGCTATCAATATTTGTCGCTGCATAGACTGCTGATTTTTTCGTTCTCTTATCTTGTGCTCA |    |    |    |    |    |
|                     | *****                                                         |    |    |    |    |    |
| Prim.cons.          | GGCTATCAATATTTGTCGCTGCATAGACTGCTGATTTTTTCGTTCTCTTATCTTGTGCTCA |    |    |    |    |    |

|               | 70                                                           | 80 | 90 | 100 | 110 | 120 |
|---------------|--------------------------------------------------------------|----|----|-----|-----|-----|
| MG1655        | CGTGGCCTTCTGGCGACGACGCTCATCCAGCAGAAATGAAAAATATCACCCGGCTAAAAA |    |    |     |     |     |
| MDS42x1       | CGTGGCCTTCTGGCGACGACGCTCATCCAGCAGAAATGAAAAATATCACCCGGCTAAAAA |    |    |     |     |     |
| W3110x2       | CGTGGCCTTCTGGCGACGACGCTCATCCAGCAGAAATGAAAAATATCACCCGGCTAAAAA |    |    |     |     |     |
| DH1NC_0176381 | CGTGGCCTTCTGGCGACGACGCTCATCCAGCAGAAATGAAAAATATCACCCGGCTAAAAA |    |    |     |     |     |
| ETECxx4       | CGTGGCCTTCTGGCGACGACGCTCATCCAGCAGAAATGAAAAATATCACCCGGCTAAAAA |    |    |     |     |     |
| P12bxx5       | CGTGGCCTTCTGGCGACGACGCTCATCCAGCAGAAATGAAAAATATCACCCGGCTAAAAA |    |    |     |     |     |
| BW2952        | CGTGGCCTTCTGGCGACGACGCTCATCCAGCAGAAATGAAAAATATCACCCGGCTAAAAA |    |    |     |     |     |
| DH10Bx7       | CGTGGCCTTCTGGCGACGACGCTCATCCAGCAGAAATGAAAAATATCACCCGGCTAAAAA |    |    |     |     |     |
| C321deltaA    | CGTGGCCTTCTGGCGACGACGCTCATCCAGCAGAAATGAAAAATATCACCCGGCTAAAAA |    |    |     |     |     |
| Wxxxxx20      | CGTGGCCTTCTGGCGACGACGCTCATCCAGCAGAAATGAAAAATATCACCCGGCAAAAAA |    |    |     |     |     |
| KO11FL        | CGTGGCCTTCTGGCGACGACGCTCATCCAGCAGAAATGAAAAATATCACCCGGCAAAAAA |    |    |     |     |     |
| LY180x19      | CGTGGCCTTCTGGCGACGACGCTCATCCAGCAGAAATGAAAAATATCACCCGGCAAAAAA |    |    |     |     |     |
| E24377A       | CGTGGCCTTCTGGCGACGACGCTCATCCAGCAGAAATGAAAAATATCACCCGGCAAAAAA |    |    |     |     |     |
| SE11xx14      | CGTGGCCTTCTGGCGACGACGCTCATCCAGCAGAAATGAAAAATATCACCCGGCAAAAAA |    |    |     |     |     |
| 2009EL_2050   | CGTGGCCTTCTGGCGACGACGCTCATCCAGCAGAAATGAAAAATATCACCCGGCAAAAAA |    |    |     |     |     |
| 2011C_3493    | CGTGGCCTTCTGGCGACGACGCTCATCCAGCAGAAATGAAAAATATCACCCGGCAAAAAA |    |    |     |     |     |
| 55989x18      | CGTGGCCTTCTGGCGACGACGCTCATCCAGCAGAAATGAAAAATATCACCCGGCAAAAAA |    |    |     |     |     |
| IAI1xx13      | CGTGGCCTTCTGGCGACGACGCTCATCCAGCAGAAATGAAAAATATCACCCGGCAAAAAA |    |    |     |     |     |
| O103H2        | CGTGGCCTTCTGGCGACGACGCTCATCCAGCAGAAATGAAAAATATCACCCGGCAAAAAA |    |    |     |     |     |
| APECxx11      | CGTGGCCTTCTGGCGACGACGCTCATCCAGCAGAAATGAAAAATATCACCCGGCAAAAAA |    |    |     |     |     |
| UMNK88        | CGTGGCCTTCTGGCGACGACGCTCATCCAGCAGAAATGAAAAATATCACCCGGCAAAAAA |    |    |     |     |     |



|                   |                                                             |
|-------------------|-------------------------------------------------------------|
| MG1655            | AGAAATAAAGACATTGACGCATCCCGCCCGGCTAACTATGAATAGATGAAGTAAAATTT |
| MDS42x1           | AGAAATAAAGACATTGACGCATCCCGCCCGGCTAACTATGAATAGATGAAGTAAAATTT |
| W3110x2           | AGAAATAAAGACATTGACGCATCCCGCCCGGCTAACTATGAATAGATGAAGTAAAATTT |
| DH1NC_0176381     | AGAAATAAAGACATTGACGCATCCCGCCCGGCTAACTATGAATAGATGAAGTAAAATTT |
| ETECxx4           | AGAAATAAAGACATTGACGCATCCCGCCCGGCTAACTATGAATAGATGAAGTAAAATTT |
| P12bxx5           | AGAAATAAAGACATTGACGCATCCCGCCCGGCTAACTATGAATAGATGAAGTAAAATTT |
| BW2952            | AGAAATAAAGACATTGACGCATCCCGCCCGGCTAACTATGAATAGATGAAGTAAAATTT |
| DH10Bx7           | AGAAATAAAGACATTGACGCATCCCGCCCGGCTAACTATGAATAGATGAAGTAAAATTT |
| C321deltaA        | AGAAATAAAGACATTGACGCATCCCGCCCGGCTAACTATGAATAGATGAAGTAAAATTT |
| Wxxxxx20          | AGAAATAAAGACATTGACGCATCCCGCCCGGCTAACTATGAATAGATGAAGTAAAATTT |
| KO11FL            | AGAAATAAAGACATTGACGCATCCCGCCCGGCTAACTATGAATAGATGAAGTAAAATTT |
| LY180x19          | AGAAATAAAGACATTGACGCATCCCGCCCGGCTAACTATGAATAGATGAAGTAAAATTT |
| E24377A           | AGAAATAAAGACATTGACGCATCCCGCCCGGCTAACTATGAATAGATGAAGTAAAATTT |
| SE11xx14          | AGAAATAAAGACATTGACGCATCCCGCCCGGCTAACTATGAATAGATGAAGTAAAATTT |
| 2009EL_2050       | AGAAATAAAGACATTGACGCATCCCGCCCGGCTAACTATGAATAGATGAAGTAAAATTT |
| 2011C_3493        | AGAAATAAAGACATTGACGCATCCCGCCCGGCTAACTATGAATAGATGAAGTAAAATTT |
| 55989x18          | AGAAATAAAGACATTGACGCATCCCGCCCGGCTAACTATGAATAGATGAAGTAAAATTT |
| IAI1xx13          | AGAAATAAAGACATTGACGCATCCCGCCCGGCTAACTATGAATAGATGAAGTAAAATTT |
| O103H2            | AGAAATAAAGACATTGACGCATCCCGCCCGGCTAACTATGAATAGATGAAGTAAAATTT |
| APECxx11          | AGAAATAAAGACATTGACGCATCCCGCCCGGCTAACTATGAATAGATGAAGTAAAATTT |
| UMNK88            | AGAAATAAAGACATTGACGCATCCCGCCCGGCTAACTATGAATAGATGAAGTAAAATTT |
| HSxxxx39          | AGAAATAAAGACATTGACGCATCCCGCCCGGCTAACTATGAATAGATGAAGTAAAATTT |
| BL21DE3           | AGAAATAAAGACATTGACGCATCCCGCCCGGCTAACTATGAATAGATGAAGTAAAATTT |
| REL606            | AGAAATAAAGACATTGACGCATCCCGCCCGGCTAACTATGAATAGATGAAGTAAAATTT |
| BL21_GoldDE3pLysS | AGAAATAAAGACATTGACGCATCCCGCCCGGCTAACTATGAATAGATGAAGTAAAATTT |
| ATCCxx37          | AGAAATAAAGACATTGACGCATCCCGCCCGGCTAACTATGAATAGATGAAGTAAAATTT |
| O111H             | AGAAATAAAGACATTGACGCATCCCGCCCGGCTAACTATGAATAGATGAAGTAAAATTT |
| O26H11            | AGAAATAAAGACATTGACGCATCCCGCCCGGCTAACTATGAATAGATGAAGTAAAATTT |
| UMN026            | AGAAATAAAGACATTGACGCATCTCGCCCGGCTAACTATGAATAGATGAAGTAAAATTC |
| 042NC_0176261     | AGAAATAAAGACATTGACGCATCTCGCCCGGCTAACTATGAATAGATGAAGTAAAATTC |
| IAI39x23          | AGAAATAAAGACATTGACGCATCCCGCCCGGCTAACTATGAATAGATGAAGTAAAATTC |
| O7K1xx29          | AGAAATAAAGACATTGACGCATCCCGCCCGGCTAACTATGAATAGATGAAGTAAAATTC |
| SMS_3_5           | AGAAATAAAGACATTGACGCATCCCGCCCGGCTAACTATGAATAGATGAAGTAAAATTC |
| RM12579           | AGAAATAAAGACATTGACGCATCTCTCCCGGCTAACTATGAATAGATGAAGTAAAATTC |
| CB9615            | AGAAATAAAGACATTGACGCATCTCTCCCGGCTAACTATGAATAGATGAAGTAAAATTC |
| Xuzhou21          | AGAAATAAAGACATTGACGCATCTCTCCCGGCTAACTATGAATAGATGAAGTAAAATTC |
| TW14359           | AGAAATAAAGACATTGACGCATCTCTCCCGGCTAACTATGAATAGATGAAGTAAAATTC |
| EC4115            | AGAAATAAAGACATTGACGCATCTCTCCCGGCTAACTATGAATAGATGAAGTAAAATTC |
| EDL933            | AGAAATAAAGACATTGACGCATCTCTCCCGGCTAACTATGAATAGATGAAGTAAAATTC |
| Sakaix28          | AGAAATAAAGACATTGACGCATCTCTCCCGGCTAACTATGAATAGATGAAGTAAAATTC |
|                   | ***** * *****                                               |
| Prim.cons.        | AGAAATAAAGACATTGACGCATCCCGCCCGGCTAACTATGAATAGATGAAGTAAAATTT |

250            260            270            280            290            300

|               |                                                               |
|---------------|---------------------------------------------------------------|
| MG1655        | ATTAATAGTTGTAAAACAGGAGTTTCATTACAATTTATATATTTAAAGAGGCGGAATGATT |
| MDS42x1       | ATTAATAGTTGTAAAACAGGAGTTTCATTACAATTTATATATTTAAAGAGGCGGAATGATT |
| W3110x2       | ATTAATAGTTGTAAAACAGGAGTTTCATTACAATTTATATATTTAAAGAGGCGGAATGATT |
| DH1NC_0176381 | ATTAATAGTTGTAAAACAGGAGTTTCATTACAATTTATATATTTAAAGAGGCGGAATGATT |
| ETECxx4       | ATTAATAGTTGTAAAACAGGAGTTTCATTACAATTTATATATTTAAAGAGGCGGAATGATT |
| P12bxx5       | ATTAATAGTTGTAAAACAGGAGTTTCATTACAATTTATATATTTAAAGAGGCGGAATGATT |
| BW2952        | ATTAATAGTTGTAAAACAGGAGTTTCATTACAATTTATATATTTAAAGAGGCGGAATGATT |
| DH10Bx7       | ATTAATAGTTGTAAAACAGGAGTTTCATTACAATTTATATATTTAAAGAGGCGGAATGATT |
| C321deltaA    | ATTAATAGTTGTAAAACAGGAGTTTCATTACAATTTATATATTTAAAGAGGCGGAATGATT |
| Wxxxxx20      | ATTAATAGTTGTAAAACAGGAGTTTCATTACAATTTATATATTTAAAGAGGCGGAATGATT |
| KO11FL        | ATTAATAGTTGTAAAACAGGAGTTTCATTACAATTTATATATTTAAAGAGGCGGAATGATT |
| LY180x19      | ATTAATAGTTGTAAAACAGGAGTTTCATTACAATTTATATATTTAAAGAGGCGGAATGATT |
| E24377A       | ATTAATAGTTGTAAAACAGGAGTTTCATTACAATTTATATATTTAAAGAGGCGGAATGATT |
| SE11xx14      | ATTAATAGTTGTAAAACAGGAGTTTCATTACAATTTATATATTTAAAGAGGCGGAATGATT |
| 2009EL_2050   | ATTAATAGTTGTAAAACAGGAGTTTCATTACAATTTATATATTTAAAGAGGCGGAATGATT |
| 2011C_3493    | ATTAATAGTTGTAAAACAGGAGTTTCATTACAATTTATATATTTAAAGAGGCGGAATGATT |
| 55989x18      | ATTAATAGTTGTAAAACAGGAGTTTCATTACAATTTATATATTTAAAGAGGCGGAATGATT |
| IAI1xx13      | ATTAATAGTTGTAAAACAGGAGTTTCATTACAATTTATATATTTAAAGAGGCGGAATGATT |
| O103H2        | ATTAATAGTTGTAAAACAGGAGTTTCATTACAATTTATATATTTAAAGAGGCGGAATGATT |
| APECxx11      | ATTAATAGTTGTAAAACAGGAGTTTCATTACAATTTATATATTTAAAGAGGCGGAATGATT |
| UMNK88        | ATTAATAGTTGTAAAACAGGAGTTTCATTACAATTTATATATTTAAAGAGGCGGAATGATT |
| HSxxxx39      | ATTAATAGTTGTAAAACAGGAGTTTCATTACAATTTATATATTTAAAGAGGCGGAATGATT |

BL21DE3 ATTAATAGTTGTA AACAGGAGTTTCATTACAATTTATATATTTAAAGAGGCGAATGATT  
REL606 ATTAATAGTTGTA AACAGGAGTTTCATTACAATTTATATATTTAAAGAGGCGAATGATT  
BL21\_GoldDE3pLysS ATTAATAGTTGTA AACAGGAGTTTCATTACAATTTATATATTTAAAGAGGCGAATGATT  
ATCCxx37 ATTAATAGTTGTA AACAGGAGTTTCATTACAATTTATATATTTAAAGAGGCGAATGATT  
O111H ATTAATAGTTGTA AACAGGAGTTTCATTACAATTTATATATTTAAAGAGGCGAATGATT  
O26H11 ATTAATAGTTGTA AACAGGAGTTTCATTACAATTTATATATTTAAAGAGGCGAATGATT  
UMN026 ATTAATAGTTGTA AACAGGAGTTTCATTACAATTTATATATTTAAAGAGGCGAATGATT  
042NC\_0176261 ATTAATAGTTGTA AACAGGAGTTTCATTACAATTTATATATTTAAAGAGGCGAATGATT  
IAI39x23 TTTAATAGTTGTA AACAGGAGTTTCATTACAATTTATATATTTAAAGAGGCGAATGATT  
O7K1xx29 TTTAATAGTTGTA AACAGGAGTTTCATTACAATTTATATATTTAAAGAGGCGAATGATT  
SMS\_3\_5 TTTAATAGTTGTA AACAGGAGTTTCATTACAATTTATATATTTAAAGAGGCGAATGATT  
RM12579 ATTAATAGTTGTA AACAGGAGTTTCATTACAATTTATATATTTAAAGAGGCGAATGATT  
CB9615 ATTAATAGTTGTA AACAGGAGTTTCATTACAATTTATATATTTAAAGAGGCGAATGATT  
Xuzhou21 ATTAATAGTTGTA AACAGGAGTTTCATTACAATTTATATATTTAAAGAGGCGAATGATT  
TW14359 ATTAATAGTTGTA AACAGGAGTTTCATTACAATTTATATATTTAAAGAGGCGAATGATT  
EC4115 ATTAATAGTTGTA AACAGGAGTTTCATTACAATTTATATATTTAAAGAGGCGAATGATT  
EDL933 ATTAATAGTTGTA AACAGGAGTTTCATTACAATTTATATATTTAAAGAGGCGAATGATT  
Sakaix28 ATTAATAGTTGTA AACAGGAGTTTCATTACAATTTATATATTTAAAGAGGCGAATGATT  
\*\*\*\*\*  
Prim.cons. ATTAATAGTTGTA AACAGGAGTTTCATTACAATTTATATATTTAAAGAGGCGAATGATT

310 320 330 340 350 360

MG1655 ATGACTGAAATCGTTGCAGATAAACCGGTAGAAAGTAGTTAAAAACGCAATCGAAACCGCA  
MDS42x1 ATGACTGAAATCGTTGCAGATAAACCGGTAGAAAGTAGTTAAAAACGCAATCGAAACCGCA  
W3110x2 ATGACTGAAATCGTTGCAGATAAACCGGTAGAAAGTAGTTAAAAACGCAATCGAAACCGCA  
DH1NC\_0176381 ATGACTGAAATCGTTGCAGATAAACCGGTAGAAAGTAGTTAAAAACGCAATCGAAACCGCA  
ETECxx4 ATGACTGAAATCGTTGCAGATAAACCGGTAGAAAGTAGTTAAAAACGCAATCGAAACCGCA  
P12bxx5 ATGACTGAAATCGTTGCAGATAAACCGGTAGAAAGTAGTTAAAAACGCAATCGAAACCGCA  
BW2952 ATGACTGAAATCGTTGCAGATAAACCGGTAGAAAGTAGTTAAAAACGCAATCGAAACCGCA  
DH10Bx7 ATGACTGAAATCGTTGCAGATAAACCGGTAGAAAGTAGTTAAAAACGCAATCGAAACCGCA  
C321deltaA ATGACTGAAATCGTTGCAGATAAACCGGTAGAAAGTAGTTAAAAACGCAATCGAAACCGCA  
Wxxxxx20 ATGACTGAAATCGTTGCAGATAAACCGGTAGAAAGTAGTTAAAAACGCAATCGAAACTGCA  
KO11FL ATGACTGAAATCGTTGCAGATAAACCGGTAGAAAGTAGTTAAAAACGCAATCGAAACTGCA  
LY180x19 ATGACTGAAATCGTTGCAGATAAACCGGTAGAAAGTAGTTAAAAACGCAATCGAAACTGCA  
E24377A ATGACTGAAATCGTTGCAGATAAACCGGTAGAAAGTAGTTAAAAACGCAATCGAAACTGCA  
SE11xx14 ATGACTGAAATCGTTGCAGATAAACCGGTAGAAAGTAGTTAAAAACGCAATCGAAACTGCA  
2009EL\_2050 ATGACTGAAATCGTTGCAGATAAACCGGTAGAAAGTAGTTAAAAACGCAATCGAAACTGCA  
2011C\_3493 ATGACTGAAATCGTTGCAGATAAACCGGTAGAAAGTAGTTAAAAACGCAATCGAAACTGCA  
55989x18 ATGACTGAAATCGTTGCAGATAAACCGGTAGAAAGTAGTTAAAAACGCAATCGAAACTGCA  
IAI1xx13 ATGACTGAAATCGTTGCAGATAAACCGGTAGAAAGTAGTTAAAAACGCAATCGAAACTGCA  
O103H2 ATGACTGAAATCGTTGCAGATAAACCGGTAGAAAGTAGTTAAAAACGCAATCGAAACTGCA  
APECxx11 ATGACTGAAATCGTTGCAGATAAACCGGTAGAAAGTAGTTAAAAACGCAATCGAAACTGCA  
UMNK88 ATGACTGAAATCGTTGCAGATAAACCGGTAGAAAGTAGTTAAAAACGCAATCGAAACCGCA  
HSxxxx39 ATGACTGAAATCGTTGCAGATAAACCGGTAGAAAGTAGTTAAAAACGCAATCGAAACCGCA  
BL21DE3 ATGACTGAAATCGTTGCAGATAAACCGGTAGAAAGTAGTTAAAAACGCAATCGAAACCGCA  
REL606 ATGACTGAAATCGTTGCAGATAAACCGGTAGAAAGTAGTTAAAAACGCAATCGAAACCGCA  
BL21\_GoldDE3pLysS ATGACTGAAATCGTTGCAGATAAACCGGTAGAAAGTAGTTAAAAACGCAATCGAAACCGCA  
ATCCxx37 ATGACTGAAATCGTTGCAGATAAACCGGTAGAAAGTAGTTAAAAACGCAATCGAAACCGCA  
O111H ATGACTGAAATCGTTGCAGATAAACCGGTAGAAAGTAGTTAAAAACGCAATCGAAACCGCA  
O26H11 ATGACTGAAATCGTTGCAGATAAACCGGTAGAAAGTAGTTAAAAACGCAATCGAAACCGCA  
UMN026 ATGACTGAAATCGTTGCAGATAAACCGGTAGAAAGTAGTTAAAAACGCAATCGAAACCGCA  
042NC\_0176261 ATGACTGAAATCGTTGCAGATAAACCGGTAGAAAGTAGTTAAAAACGCAATCGAAACCGCA  
IAI39x23 ATGACTGAAATCGTTGCAGATAAACCGGTAGAAAGTAGTTAAAAACGCAATCGAAACCGCA  
O7K1xx29 ATGACTGAAATCGTTGCAGATAAACCGGTAGAAAGTAGTTAAAAACGCAATCGAAACCGCA  
SMS\_3\_5 ATGACTGAAATCGTTGCAGATAAACCGGTAGAAAGTAGTTAAAAACGCAATCGAAACCGCA  
RM12579 ATGACTGAAATCGTTGCAGATAAACCGGTAGAAAGTAGTTAAAAACGCAATCGAAACCGCA  
CB9615 ATGACTGAAATCGTTGCAGATAAACCGGTAGAAAGTAGTTAAAAACGCAATCGAAACCGCA  
Xuzhou21 ATGACTGAAATCGTTGCAGATAAACCGGTAGAAAGTAGTTAAAAACGCAATCGAAACCGCA  
TW14359 ATGACTGAAATCGTTGCAGATAAACCGGTAGAAAGTAGTTAAAAACGCAATCGAAACCGCA  
EC4115 ATGACTGAAATCGTTGCAGATAAACCGGTAGAAAGTAGTTAAAAACGCAATCGAAACCGCA  
EDL933 ATGACTGAAATCGTTGCAGATAAACCGGTAGAAAGTAGTTAAAAACGCAATCGAAACCGCA  
Sakaix28 ATGACTGAAATCGTTGCAGATAAACCGGTAGAAAGTAGTTAAAAACGCAATCGAAACCGCA  
\*\*\*\*\*  
Prim.cons. ATGACTGAAATCGTTGCAGATAAACCGGTAGAAAGTAGTTAAAAACGCAATCGAAACCGCA

370 380 390 400 410 420

|                   |                                                              |  |  |  |  |
|-------------------|--------------------------------------------------------------|--|--|--|--|
|                   |                                                              |  |  |  |  |
| MG1655            | GATGGAGCATTAGATCTTTATAATAAATATCTCGATCAGGTCATCCCCTGGCAGACCTTT |  |  |  |  |
| MDS42x1           | GATGGAGCATTAGATCTTTATAATAAATATCTCGATCAGGTCATCCCCTGGCAGACCTTT |  |  |  |  |
| W3110x2           | GATGGAGCATTAGATCTTTATAATAAATATCTCGATCAGGTCATCCCCTGGCAGACCTTT |  |  |  |  |
| DH1NC_0176381     | GATGGAGCATTAGATCTTTATAATAAATATCTCGATCAGGTCATCCCCTGGCAGACCTTT |  |  |  |  |
| ETECxx4           | GATGGAGCATTAGATCTTTATAATAAATATCTCGATCAGGTCATCCCCTGGCAGACCTTT |  |  |  |  |
| P12bxx5           | GATGGAGCATTAGATCTTTATAATAAATATCTCGATCAGGTCATCCCCTGGCAGACCTTT |  |  |  |  |
| BW2952            | GATGGAGCATTAGATCTTTATAATAAATATCTCGATCAGGTCATCCCCTGGCAGACCTTT |  |  |  |  |
| DH10Bx7           | GATGGAGCATTAGATCTTTATAATAAATATCTCGATCAGGTCATCCCCTGGCAGACCTTT |  |  |  |  |
| C321deltaA        | GATGGAGCATTAGATCTTTATAATAAATATCTCGATCAGGTCATCCCCTGGCAGACCTTT |  |  |  |  |
| Wxxxxx20          | GATGGAGCATTAGATCTTTATAATAAATATCTCGATCAGGTCATCCCCTGGCAGACCTTT |  |  |  |  |
| KO11FL            | GATGGAGCATTAGATCTTTATAATAAATATCTCGATCAGGTCATCCCCTGGCAGACCTTT |  |  |  |  |
| LY180x19          | GATGGAGCATTAGATCTTTATAATAAATATCTCGATCAGGTCATCCCCTGGCAGACCTTT |  |  |  |  |
| E24377A           | GATGGAGCATTAGATCTTTATAATAAATATCTCGATCAGGTCATCCCCTGGCAGACCTTT |  |  |  |  |
| SE11xx14          | GATGGAGCATTAGATCTTTATAATAAATATCTCGATCAGGTCATCCCCTGGCAGACCTTT |  |  |  |  |
| 2009EL_2050       | GATGGAGCATTAGATCTTTATAATAAATATCTCGATCAGGTCATCCCCTAGCAGACCTTT |  |  |  |  |
| 2011C_3493        | GATGGAGCATTAGATCTTTATAATAAATATCTCGATCAGGTCATCCCCTAGCAGACCTTT |  |  |  |  |
| 55989x18          | GATGGAGCATTAGATCTTTATAATAAATATCTCGATCAGGTCATCCCCTGGCAGACCTTT |  |  |  |  |
| IAI1xx13          | GATGGAGCATTAGATCTTTATAATAAATATCTCGATCAGGTCATCCCCTGGCAGACCTTT |  |  |  |  |
| O103H2            | GATGGAGCATTAGATCTTTATAATAAATATCTCGATCAGGTCATCCCCTGGCAGACCTTT |  |  |  |  |
| APECxx11          | GATGGAGCATTAGATCTTTATAATAAATATCTCGATCAGGTCATCCCCTGGCAGACCTTT |  |  |  |  |
| UMNK88            | GATGGAGCATTAGATCTTTATAATAAATATCTCGATCAGGTCATCCCCTGGCAGACCTTT |  |  |  |  |
| HSxxxx39          | GATGGAGCATTAGATCTTTATAATAAATATCTCGATCAGGTCATCCCCTGGCAGACCTTT |  |  |  |  |
| BL21DE3           | GATGGAGCATTAGATCTTTATAATAAATATCTCGATCAGGTCATCCCCTGGCAGACCTTT |  |  |  |  |
| REL606            | GATGGAGCATTAGATCTTTATAATAAATATCTCGATCAGGTCATCCCCTGGCAGACCTTT |  |  |  |  |
| BL21_GoldDE3pLysS | GATGGAGCATTAGATCTTTATAATAAATATCTCGATCAGGTCATCCCCTGGCAGACCTTT |  |  |  |  |
| ATCCxx37          | GATGGAGCATTAGATCTTTATAATAAATATCTCGATCAGGTCATCCCCTGGCAGACCTTT |  |  |  |  |
| O111H_            | GATGGAGCATTAGATCTTTATAATAAATATCTCGATCAGGTCATCCCCTGGCAGACCTTT |  |  |  |  |
| O26H11            | GATGGAGCATTAGATCTTTATAATAAATATCTCGATCAGGTCATCCCCTGGCAGACCTTT |  |  |  |  |
| UMN026            | GATGGAGCATTAGACCTTTATAATAAATATCTCGATCAGGTCATCCCCTGGCAGACCTTC |  |  |  |  |
| 042NC_0176261     | GATGGAGCATTAGACCTTTATAATAAATATCTCGATCAGGTCATCCCCTGGCAGACCTTC |  |  |  |  |
| IAI39x23          | GATGGAGCATTAGATCTTTATAATAAATATCTCGATCAGGTCATCCCCTGGCAGACCTTT |  |  |  |  |
| O7K1xx29          | GATGGAGCATTAGATCTTTATAATAAATATCTCGATCAGGTCATCCCCTGGCAGACCTTT |  |  |  |  |
| SMS_3_5           | GATGGAGCATTAGATCTTTATAATAAATATCTCGATCAGGTCATCCCCTGGCAGACCTTT |  |  |  |  |
| RM12579           | GATGGAGCATTGGATCTTTATAATAAATATCTCGATCAGGTCATCCCCTGGCAGACCTTT |  |  |  |  |
| CB9615            | GATGGAGCATTGGATCTTTATAATAAATATCTCGATCAGGTCATCCCCTGGCAGACCTTT |  |  |  |  |
| Xuzhou21          | GATGGAGCATTGGATCTTTATAATAAATATCTCGATCAGGTCATCCCCTGGCAGACCTTT |  |  |  |  |
| TW14359           | GATGGAGCATTGGATCTTTATAATAAATATCTCGATCAGGTCATCCCCTGGCAGACCTTT |  |  |  |  |
| EC4115            | GATGGAGCATTGGATCTTTATAATAAATATCTCGATCAGGTCATCCCCTGGCAGACCTTT |  |  |  |  |
| EDL933            | GATGGAGCATTGGATCTTTATAATAAATATCTCGATCAGGTCATCCCCTGGCAGACCTTT |  |  |  |  |
| Sakaix28          | GATGGAGCATTGGATCTTTATAATAAATATCTCGATCAGGTCATCCCCTGGCAGACCTTT |  |  |  |  |
|                   | ***** * * *****                                              |  |  |  |  |
| Prim.cons.        | GATGGAGCATTAGATCTTTATAATAAATATCTCGATCAGGTCATCCCCTGGCAGACCTTT |  |  |  |  |

|               |                                                             |     |     |     |     |     |
|---------------|-------------------------------------------------------------|-----|-----|-----|-----|-----|
|               | 430                                                         | 440 | 450 | 460 | 470 | 480 |
|               |                                                             |     |     |     |     |     |
| MG1655        | GATGAAACCATAAAAGAGTTAAGTCGCTTTAAACAGGAGTATTACAGGCAGCCTCCGTT |     |     |     |     |     |
| MDS42x1       | GATGAAACCATAAAAGAGTTAAGTCGCTTTAAACAGGAGTATTACAGGCAGCCTCCGTT |     |     |     |     |     |
| W3110x2       | GATGAAACCATAAAAGAGTTAAGTCGCTTTAAACAGGAGTATTACAGGCAGCCTCCGTT |     |     |     |     |     |
| DH1NC_0176381 | GATGAAACCATAAAAGAGTTAAGTCGCTTTAAACAGGAGTATTACAGGCAGCCTCCGTT |     |     |     |     |     |
| ETECxx4       | GATGAAACCATAAAAGAGTTAAGTCGCTTTAAACAGGAGTATTACAGGCAGCCTCCGTT |     |     |     |     |     |
| P12bxx5       | GATGAAACCATAAAAGAGTTAAGTCGCTTTAAACAGGAGTATTACAGGCAGCCTCCGTT |     |     |     |     |     |
| BW2952        | GATGAAACCATAAAAGAGTTAAGTCGCTTTAAACAGGAGTATTACAGGCAGCCTCCGTT |     |     |     |     |     |
| DH10Bx7       | GATGAAACCATAAAAGAGTTAAGTCGCTTTAAACAGGAGTATTACAGGCAGCCTCCGTT |     |     |     |     |     |
| C321deltaA    | GATGAAACCATAAAAGAGTTAAGTCGCTTTAAACAGGAGTATTACAGGCAGCCTCCGTT |     |     |     |     |     |
| Wxxxxx20      | GATGAAACCATAAAAGAGTTAAGTCGCTTTAAACAGGAGTATTACAGGCAGCCTCCGTT |     |     |     |     |     |
| KO11FL        | GATGAAACCATAAAAGAGTTAAGTCGCTTTAAACAGGAGTATTACAGGCAGCCTCCGTT |     |     |     |     |     |
| LY180x19      | GATGAAACCATAAAAGAGTTAAGTCGCTTTAAACAGGAGTATTACAGGCAGCCTCCGTT |     |     |     |     |     |
| E24377A       | GATGAAACCATAAAAGAGTTAAGTCGCTTTAAACAGGAGTATTACAGGCAGCCTCCGTT |     |     |     |     |     |
| SE11xx14      | GATGAAACCATAAAAGAGTTAAGTCGCTTTAAACAGGAGTATTACAGGCAGCCTCCGTT |     |     |     |     |     |
| 2009EL_2050   | GATGAAACCATAAAAGAGTTAAGTCGCTTTAAACAGGAGTATTACAGGCAGCCTCCGTT |     |     |     |     |     |
| 2011C_3493    | GATGAAACCATAAAAGAGTTAAGTCGCTTTAAACAGGAGTATTACAGGCAGCCTCCGTT |     |     |     |     |     |
| 55989x18      | GATGAAACCATAAAAGAGTTAAGTCGCTTTAAACAGGAGTATTACAGGCAGCCTCCGTT |     |     |     |     |     |
| IAI1xx13      | GATGAAACCATAAAAGAGTTAAGTCGCTTTAAACAGGAGTATTACAGGCAGCCTCCGTT |     |     |     |     |     |
| O103H2        | GATGAAACCATAAAAGAGTTAAGTCGCTTTAAACAGGAGTATTACAGGCAGCCTCCGTT |     |     |     |     |     |
| APECxx11      | GATGAAACCATAAAAGAGTTAAGTCGCTTTAAACAGGAGTATTACAGGCAGCCTCCGTT |     |     |     |     |     |
| UMNK88        | GATGAAACCATAAAAGAGTTAAGTCGCTTTAAACAGGAGTATTACAGGCAGCCTCCGTT |     |     |     |     |     |
| HSxxxx39      | GATGAAACCATAAAAGAGTTAAGTCGCTTTAAACAGGAGTATTACAGGCAGCCTCCGTT |     |     |     |     |     |



|                   | 550                 | 560                                     | 570 | 580 | 590 | 600 |
|-------------------|---------------------|-----------------------------------------|-----|-----|-----|-----|
| MG1655            | CAAACAGTGTATGAATGGT | TGGTGTTCGACGCAATTGCTCGCAGCGTATATTTTGCTA |     |     |     |     |
| MDS42x1           | CAAACAGTGTATGAATGGT | TGGTGTTCGACGCAATTGCTCGCAGCGTATATTTTGCTA |     |     |     |     |
| W3110x2           | CAAACAGTGTATGAATGGT | TGGTGTTCGACGCAATTGCTCGCAGCGTATATTTTGCTA |     |     |     |     |
| DH1NC_0176381     | CAAACAGTGTATGAATGGT | TGGTGTTCGACGCAATTGCTCGCAGCGTATATTTTGCTA |     |     |     |     |
| ETECxx4           | CAAACAGTGTATGAATGGT | TGGTGTTCGACGCAATTGCTCGCAGCGTATATTTTGCTA |     |     |     |     |
| P12bxx5           | CAAACAGTGTATGAATGGT | TGGTGTTCGACGCAATTGCTCGCAGCGTATATTTTGCTA |     |     |     |     |
| BW2952            | CAAACAGTGTATGAATGGT | TGGTGTTCGACGCAATTGCTCGCAGCGTATATTTTGCTA |     |     |     |     |
| DH10Bx7           | CAAACAGTGTATGAATGGT | TGGTGTTCGACGCAATTGCTCGCAGCGTATATTTTGCTA |     |     |     |     |
| C321deltaA        | CAAACAGTGTATGAATGGT | TGGTGTTCGACGCAATTGCTCGCAGCGTATATTTTGCTA |     |     |     |     |
| Wxxxxx20          | CAAACAGTGTATGAATGGT | TGGTGTTCGACGCAATTGCTCGCAGCGTATATTTTCTA  |     |     |     |     |
| KO11FL            | CAAACAGTGTATGAATGGT | TGGTGTTCGACGCAATTGCTCGCAGCGTATATTTTCTA  |     |     |     |     |
| LY180x19          | CAAACAGTGTATGAATGGT | TGGTGTTCGACGCAATTGCTCGCAGCGTATATTTTCTA  |     |     |     |     |
| E24377A           | CAAACAGTGTATGAATGGT | TGGTGTTCGACGCAATTGCTCGCAGCGTATATTTTCTA  |     |     |     |     |
| SE11xx14          | CAAACAGTGTATGAATGGT | TGGTGTTCGACGCAATTGCTCGCAGCGTATATTTTCTA  |     |     |     |     |
| 2009EL_2050       | CAAACAGTGTATGAATGGT | TGGTGTTCGACGCAATTGCTCGCAGCGTATATTTTCTA  |     |     |     |     |
| 2011C_3493        | CAAACAGTGTATGAATGGT | TGGTGTTCGACGCAATTGCTCGCAGCGTATATTTTCTA  |     |     |     |     |
| 55989x18          | CAAACAGTGTATGAATGGT | TGGTGTTCGACGCAATTGCTCGCAGCGTATATTTTCTA  |     |     |     |     |
| IAI1xx13          | CAAACAGTGTATGAATGGT | TGGTGTTCGACGCAATTGCTCGCAGCGTATATTTTCTA  |     |     |     |     |
| O103H2            | CAAACAGTGTATGAATGGT | TGGTGTTCGACGCAATTGCTCGCAGCGTATATTTTCTA  |     |     |     |     |
| APECxx11          | CAAACAGTGTATGAATGGT | TGGTGTTCGACGCAATTGCTCGCAGCGTATATTTTCTA  |     |     |     |     |
| UMNK88            | CAAACAGTGTATGAATGGT | TGGTGTTCGACGCAATTGCTCGCAGCGTATATTTTGCTA |     |     |     |     |
| HSxxxx39          | CAAACAGTGTATGAATGGT | TGGTGTTCGACGCAATTGCTCGCAGCGTATATTTTGCTA |     |     |     |     |
| BL21DE3           | CAAACAGTGTATGAATGGT | TGGTGTTCGACGCAATTGCTCGCAGCGTATATTTTGCTA |     |     |     |     |
| REL606            | CAAACAGTGTATGAATGGT | TGGTGTTCGACGCAATTGCTCGCAGCGTATATTTTGCTA |     |     |     |     |
| BL21_GoldDE3pLysS | CAAACAGTGTATGAATGGT | TGGTGTTCGACGCAATTGCTCGCAGCGTATATTTTGCTA |     |     |     |     |
| ATCCxx37          | CAAACAGTGTATGAATGGT | TGGTGTTCGACGCAATTGCTCGCAGCGTATATTTTGCTA |     |     |     |     |
| O111H             | CAAACAGTGTATGAATGGT | TGGTGTTCGACGCAATTGCTCGCAGCGTATATTTTGCTA |     |     |     |     |
| O26H11            | CAAACAGTGTATGAATGGT | TGGTGTTCGACGCAATTGCTCGCAGCGTATATTTTGCTA |     |     |     |     |
| UMN026            | CAAACGGTGTATGAATGGT | TGGTGTTCGACGCAATTGCTCGCAGCGTATATTTTGCTA |     |     |     |     |
| 042NC_0176261     | CAAACGGTGTATGAATGGT | TGGTGTTCGACGCAATTGCTCGCAGCATATATTTTGCTA |     |     |     |     |
| IAI39x23          | CAAACAGTGTATGAATGGT | TGGTGTTCGACGCAATTGCTCGCAGCGTATATTTTGCTA |     |     |     |     |
| O7K1xx29          | CAAACAGTGTATGAATGGT | TGGTGTTCGACGCAATTGCTCGCAGCGTATATTTTGCTA |     |     |     |     |
| SMS_3_5           | CAAACAGTGTATGAATGGT | TGGTGTTCGACGCAATTGCTCGCAGCGTATATTTTGCTA |     |     |     |     |
| RM12579           | CAAACAGTGTATGAATGGT | TGGTGTTCGACGCAATTGCTCGCAGCGTATATTTTGCTA |     |     |     |     |
| CB9615            | CAAACAGTGTATGAATGGT | TGGTGTTCGACGCAATTGCTCGCAGCGTATATTTTGCTA |     |     |     |     |
| Xuzhou21          | CAAACAGTGTATGAATGGT | TGGTGTTCGACGCAATTGCTCGCAGCGTATATTTTGCTA |     |     |     |     |
| TW14359           | CAAACAGTGTATGAATGGT | TGGTGTTCGACGCAATTGCTCGCAGCGTATATTTTGCTA |     |     |     |     |
| EC4115            | CAAACAGTGTATGAATGGT | TGGTGTTCGACGCAATTGCTCGCAGCGTATATTTTGCTA |     |     |     |     |
| EDL933            | CAAACAGTGTATGAATGGT | TGGTGTTCGACGCAATTGCTCGCAGCGTATATTTTGCTA |     |     |     |     |
| Sakaix28          | CAAACAGTGTATGAATGGT | TGGTGTTCGACGCAATTGCTCGCAGCGTATATTTTGCTA |     |     |     |     |
| Prim.cons.        | CAAACAGTGTATGAATGGT | TGGTGTTCGACGCAATTGCTCGCAGCGTATATTTTGCTA |     |     |     |     |

|               | 610                                                       | 620 | 630 | 640 | 650 | 660 |
|---------------|-----------------------------------------------------------|-----|-----|-----|-----|-----|
| MG1655        | TTTGATGAGTACAATGAGAAGAAAGCATCCGCCAGAAAGACATTCTCATTAAAGGTA | CTG |     |     |     |     |
| MDS42x1       | TTTGATGAGTACAATGAGAAGAAAGCATCCGCCAGAAAGACATTCTCATTAAAGGTA | CTG |     |     |     |     |
| W3110x2       | TTTGATGAGTACAATGAGAAGAAAGCATCCGCCAGAAAGACATTCTCATTAAAGGTA | CTG |     |     |     |     |
| DH1NC_0176381 | TTTGATGAGTACAATGAGAAGAAAGCATCCGCCAGAAAGACATTCTCATTAAAGGTA | CTG |     |     |     |     |
| ETECxx4       | TTTGATGAGTACAATGAGAAGAAAGCATCCGCCAGAAAGACATTCTCATTAAAGGTA | CTG |     |     |     |     |
| P12bxx5       | TTTGATGAGTACAATGAGAAGAAAGCATCCGCCAGAAAGACATTCTCATTAAAGGTA | CTG |     |     |     |     |
| BW2952        | TTTGATGAGTACAATGAGAAGAAAGCATCCGCCAGAAAGACATTCTCATTAAAGGTA | CTG |     |     |     |     |
| DH10Bx7       | TTTGATGAGTACAATGAGAAGAAAGCATCCGCCAGAAAGACATTCTCATTAAAGGTA | CTG |     |     |     |     |
| C321deltaA    | TTTGATGAGTACAATGAGAAGAAAGCATCCGCCAGAAAGACATTCTCATTAAAGGTA | CTG |     |     |     |     |
| Wxxxxx20      | TTTGATGAGTACAATGAGAAGAAAGCATCCGCCAGAAAGACATTCTCATTAAAGGTA | CTG |     |     |     |     |
| KO11FL        | TTTGATGAGTACAATGAGAAGAAAGCATCCGCCAGAAAGACATTCTCATTAAAGGTA | CTG |     |     |     |     |
| LY180x19      | TTTGATGAGTACAATGAGAAGAAAGCATCCGCCAGAAAGACATTCTCATTAAAGGTA | CTG |     |     |     |     |
| E24377A       | TTTGATGAGTACAATGAGAAGAAAGCATCCGCCAGAAAGACATTCTCATTAAAGGTA | CTG |     |     |     |     |
| SE11xx14      | TTTGATGAGTACAATGAGAAGAAAGCATCCGCCAGAAAGACATTCTCATTAAAGGTA | CTG |     |     |     |     |
| 2009EL_2050   | TTTGATGAGTACAATGAGAAGAAAGCATCCGCCAGAAAGACATTCTCATTAAAGGTA | CTG |     |     |     |     |
| 2011C_3493    | TTTGATGAGTACAATGAGAAGAAAGCATCCGCCAGAAAGACATTCTCATTAAAGGTA | CTG |     |     |     |     |
| 55989x18      | TTTGATGAGTACAATGAGAAGAAAGCATCCGCCAGAAAGACATTCTCATTAAAGGTA | CTG |     |     |     |     |
| IAI1xx13      | TTTGATGAGTACAATGAGAAGAAAGCATCCGCCAGAAAGACATTCTCATTAAAGGTA | CTG |     |     |     |     |
| O103H2        | TTTGATGAGTACAATGAGAAGAAAGCATCCGCCAGAAAGACATTCTCATTAAAGGTA | CTG |     |     |     |     |
| APECxx11      | TTTGATGAGTACAATGAGAAGAAAGCATCCGCCAGAAAGACATTCTCATTAAAGGTA | CTG |     |     |     |     |
| UMNK88        | TTTGATGAGTACAATGAGAAGAAAGCATCCGCCAGAAAGACATTCTCATTAAAGGTA | CTG |     |     |     |     |





|                   | 730                                                          | 740 | 750 | 760 | 770 | 780 |
|-------------------|--------------------------------------------------------------|-----|-----|-----|-----|-----|
|                   |                                                              |     |     |     |     |     |
| MG1655            | TTCAACAACGCTTCCGGGAAACTGCTGGCGTTAGATAGCCAGTTAACCAATGATTTTTCA |     |     |     |     |     |
| MDS42x1           | TTCAACAACGCTTCCGGGAAACTGCTGGCGTTAGATAGCCAGTTAACCAATGATTTTTCA |     |     |     |     |     |
| W3110x2           | TTCAACAACGCTTCCGGGAAACTGCTGGCGTTAGATAGCCAGTTAACCAATGATTTTTCA |     |     |     |     |     |
| DH1NC_0176381     | TTCAACAACGCTTCCGGGAAACTGCTGGCGTTAGATAGCCAGTTAACCAATGATTTTTCA |     |     |     |     |     |
| ETECxx4           | TTCAACAACGCTTCCGGGAAACTGCTGGCGTTAGATAGCCAGTTAACCAATGATTTTTCA |     |     |     |     |     |
| P12bxx5           | TTCAACAACGCTTCCGGGAAACTGCTGGCGTTAGATAGCCAGTTAACCAATGATTTTTCA |     |     |     |     |     |
| BW2952            | TTCAACAACGCTTCCGGGAAACTGCTGGCGTTAGATAGCCAGTTAACCAATGATTTTTCA |     |     |     |     |     |
| DH10Bx7           | TTCAACAACGCTTCCGGGAAACTGCTGGCGTTAGATAGCCAGTTAACCAATGATTTTTCA |     |     |     |     |     |
| C321deltaA        | TTCAACAACGCTTCCGGGAAACTGCTGGCGTTAGATAGCCAGTTAACCAATGATTTTTCA |     |     |     |     |     |
| Wxxxxx20          | TTCAACAACGCTTCCGGGAAACTGCTGGCGTTAGATAGCCAGTTAACCAATGATTTTTCA |     |     |     |     |     |
| KO11FL            | TTCAACAACGCTTCCGGGAAACTGCTGGCGTTAGATAGCCAGTTAACCAATGATTTTTCA |     |     |     |     |     |
| LY180x19          | TTCAACAACGCTTCCGGGAAACTGCTGGCGTTAGATAGCCAGTTAACCAATGATTTTTCA |     |     |     |     |     |
| E24377A           | TTCAACAACGCTTCCGGGAAACTGCTGGCGTTAGATAGCCAGTTAACCAATGATTTTTCA |     |     |     |     |     |
| SE11xx14          | TTCAACAACGCTTCCGGGAAACTGCTGGCGTTAGATAGCCAGTTAACCAATGATTTTTCA |     |     |     |     |     |
| 2009EL_2050       | TTCAACAACGCTTCCGGGAAACTGCTGGCGTTAGATAGCCAGTTAACCAATGATTTTTCA |     |     |     |     |     |
| 2011C_3493        | TTCAACAACGCTTCCGGGAAACTGCTGGCGTTAGATAGCCAGTTAACCAATGATTTTTCA |     |     |     |     |     |
| 55989x18          | TTCAACAACGCTTCCGGGAAACTGCTGGCGTTAGATAGCCAGTTAACCAATGATTTTTCA |     |     |     |     |     |
| IAI1xx13          | TTCAACAACGCTTCCGGGAAACTGCTGGCGTTAGATAGCCAGTTAACCAATGATTTTTCA |     |     |     |     |     |
| O103H2            | TTCAACAACGCTTCCGGGAAACTGCTGGCGTTAGATAGCCAGTTAACCAATGATTTTTCA |     |     |     |     |     |
| APECxx11          | TTCAACAACGCTTCCGGGAAACTGCTGGCGTTAGATAGCCAGTTAACCAATGATTTTTCA |     |     |     |     |     |
| UMNK88            | TTCAACAACGCTTCCGGGAAACTGCTGGCGTTAGATAGCCAGTTAACCAATGATTTTTCA |     |     |     |     |     |
| HSxxxx39          | TTCAACAACGCTTCCGGGAAACTGCTGGCGTTAGATAGCCAGTTAACCAATGATTTTTCA |     |     |     |     |     |
| BL21DE3           | TTCAACAACGCTTCCGGGAAACTGCTGGCGTTAGATAGCCAGTTAACCAATGATTTTTCA |     |     |     |     |     |
| REL606            | TTCAACAACGCTTCCGGGAAACTGCTGGCGTTAGATAGCCAGTTAACCAATGATTTTTCA |     |     |     |     |     |
| BL21_GoldDE3pLysS | TTCAACAACGCTTCCGGGAAACTGCTGGCGTTAGATAGCCAGTTAACCAATGATTTTTCA |     |     |     |     |     |
| ATCCxx37          | TTCAACAACGCTTCCGGGAAACTGCTGGCGTTAGATAGCCAGTTAACCAATGATTTTTCA |     |     |     |     |     |
| O111H             | TTCAACAACGCTTCCGGGAAACTGCTGGCGTTAGATAGCCAGTTAACCAATGATTTTTCA |     |     |     |     |     |
| O26H11            | TTCAACAACGCTTCCGGGAAACTGCTGGCGTTAGATAGCCAGTTAACCAATGATTTTTCA |     |     |     |     |     |
| UMN026            | TTCAACAACGCTTCCGGGAAACTGCTGGCGTTAGATAGCCAGTTAACCAATGATTTTTCA |     |     |     |     |     |
| 042NC_0176261     | TTCAACAACGCTTCCGGGAAACTGCTGGCGTTAGATAGCCAGTTAACCAATGATTTTTCA |     |     |     |     |     |
| IAI39x23          | TTCAACAACGCTTCCGGGAAACTGCTGGCGTTAGATAGCCAGTTAACCAATGATTTTTCA |     |     |     |     |     |
| O7K1xx29          | TTCAACAACGCTTCCGGGAAACTGCTGGCGTTAGATAGCCAGTTAACCAATGATTTTTCA |     |     |     |     |     |
| SMS_3_5           | TTCAACAACGCTTCCGGGAAACTGCTGGCGTTAGATAGCCAGTTAACCAATGATTTTTCA |     |     |     |     |     |
| RM12579           | TTCAACAACGCTTCCGGGAAACTGCTGGCGTTAGATAGCCAGTTAACCAATGATTTTTCA |     |     |     |     |     |
| CB9615            | TTCAACAACGCTTCCGGGAAACTGCTGGCGTTAGATAGCCAGTTAACCAATGATTTTTCA |     |     |     |     |     |
| Xuzhou21          | TTCAACAACGCTTCCGGGAAACTGCTGGCGTTAGATAGCCAGTTAACCAATGATTTTTCA |     |     |     |     |     |
| TW14359           | TTCAACAACGCTTCCGGGAAACTGCTGGCGTTAGATAGCCAGTTAACCAATGATTTTTCA |     |     |     |     |     |
| EC4115            | TTCAACAACGCTTCCGGGAAACTGCTGGCGTTAGATAGCCAGTTAACCAATGATTTTTCA |     |     |     |     |     |
| EDL933            | TTCAACAACGCTTCCGGGAAACTGCTGGCGTTAGATAGCCAGTTAACCAATGATTTTTCA |     |     |     |     |     |
| Sakaix28          | TTCAACAACGCTTCCGGGAAACTGCTGGCGTTAGATAGCCAGTTAACCAATGATTTTTCA |     |     |     |     |     |
|                   | *****                                                        |     |     |     |     |     |
| Prim.cons.        | TTCAACAACGCTTCCGGGAAACTGCTGGCGTTAGATAGCCAGTTAACCAATGATTTTTCA |     |     |     |     |     |

|               | 790                                                          | 800 | 810 | 820 | 830 | 840 |
|---------------|--------------------------------------------------------------|-----|-----|-----|-----|-----|
|               |                                                              |     |     |     |     |     |
| MG1655        | GAAAAAG--CAGCTATTTCCAGTCACAGGTAGATAAAATCAGGAAGGAAGCATATGCCG  |     |     |     |     |     |
| MDS42x1       | GAAAAAG--CAGCTATTTCCAGTCACAGGTAGATAAAATCAGGAAGGAAGCATATGCCG  |     |     |     |     |     |
| W3110x2       | GAAAAAG--CAGCTATTTCCAGTCACAGGTAGATAAAATCAGGAAGGAAGCATATGCCG  |     |     |     |     |     |
| DH1NC_0176381 | GAAAAAG--CAGCTATTTCCAGTCACAGGTAGATAAAATCAGGAAGGAAGCATATGCCG  |     |     |     |     |     |
| ETECxx4       | GAAAAAG--CAGCTATTTCCAGTCACAGGTAGATAAAATCAGGAAGGAAGCATATGCCG  |     |     |     |     |     |
| P12bxx5       | GAAAAAG--CAGCTATTTCCAGTCACAGGTAGATAAAATCAGGAAGGAAGCATATGCCG  |     |     |     |     |     |
| BW2952        | GAAAAAG--CAGCTATTTCCAGTCACAGGTAGATAAAATCAGGAAGGAAGCATATGCCG  |     |     |     |     |     |
| DH10Bx7       | GAAAAAG--CAGCTATTTCCAGTCACAGGTAGATAAAATCAGGAAGGAAGCATATGCCG  |     |     |     |     |     |
| C321deltaA    | GAAAAAG--CAGCTATTTCCAGTCACAGGTAGATAAAATCAGGAAGGAAGCATATGCCG  |     |     |     |     |     |
| Wxxxxx20      | GAAAAAG--CAGCT-TTTCAGTCACAGGTAGATAAAATCAGGAAGGAAGCGTATGCCG   |     |     |     |     |     |
| KO11FL        | GAAAAAG--CAGCT-TTTCAGTCACAGGTAGATAAAATCAGGAAGGAAGCGTATGCCG   |     |     |     |     |     |
| LY180x19      | GAAAAAG--CAGCT-TTTCAGTCACAGGTAGATAAAATCAGGAAGGAAGCGTATGCCG   |     |     |     |     |     |
| E24377A       | GAAAAAG--CAGCT-TTTCAGTCACAGGTAGATAAAATCAGGAAGGAAGCGTATGCCG   |     |     |     |     |     |
| SE11xx14      | GAAAAAG--CAGCT-TTTCAGTCACAGGTAGATAAAATCAGGAAGGAAGCGTATGCCG   |     |     |     |     |     |
| 2009EL_2050   | GAAAAAG--CAGCT-TTTCAGTCACAGGTAGATAAAATCAGGAAGGAAGCGTATGCCG   |     |     |     |     |     |
| 2011C_3493    | GAAAAAG--CAGCT-TTTCAGTCACAGGTAGATAAAATCAGGAAGGAAGCGTATGCCG   |     |     |     |     |     |
| 55989x18      | GAAAAAG--CAGCT-TTTCAGTCACAGGTAGATAAAATCAGGAAGGAAGCGTATGCCG   |     |     |     |     |     |
| IAI1xx13      | GAAAAAG--CAGCT-TTTCAGTCACAGGTAGATAAAATCAGGAAGGAAGCGTATGCCG   |     |     |     |     |     |
| O103H2        | GAAAAAG--CAGCT-TTTCAGTCACAGGTAGATAAAATCAGGAAGGAAGCGTATGCCG   |     |     |     |     |     |
| APECxx11      | GAAAAAG--CAGCT-TTTCAGTCACAGGTAGATAAAATCAGGAAGGAAGCGTATGCCG   |     |     |     |     |     |
| UMNK88        | GAAAAAAG--CAGCTATTTCCAGTCACAGGTAGATAAAATCAGGAAGGAAGCGTATGCCG |     |     |     |     |     |



|                   | 910              | 920                              | 930 | 940        | 950 | 960 |
|-------------------|------------------|----------------------------------|-----|------------|-----|-----|
|                   |                  |                                  |     |            |     |     |
| MG1655            | CGGGCGTAGTTGAAGG | AAACTGATTCCAGAATTGAAGAACAAGTTAAA | A   | TCTGTGCAGA |     |     |
| MDS42x1           | CGGGCGTAGTTGAAGG | AAACTGATTCCAGAATTGAAGAACAAGTTAAA | A   | TCTGTGCAGA |     |     |
| W3110x2           | CGGGCGTAGTTGAAGG | AAACTGATTCCAGAATTGAAGAACAAGTTAAA | A   | TCTGTGCAGA |     |     |
| DH1NC_0176381     | CGGGCGTAGTTGAAGG | AAACTGATTCCAGAATTGAAGAACAAGTTAAA | A   | TCTGTGCAGA |     |     |
| ETECxx4           | CGGGCGTAGTTGAAGG | AAACTGATTCCAGAATTGAAGAACAAGTTAAA | A   | TCTGTGCAGA |     |     |
| P12bxx5           | CGGGCGTAGTTGAAGG | AAACTGATTCCAGAATTGAAGAACAAGTTAAA | A   | TCTGTGCAGA |     |     |
| BW2952            | CGGGCGTAGTTGAAGG | AAACTGATTCCAGAATTGAAGAACAAGTTAAA | A   | TCTGTGCAGA |     |     |
| DH10Bx7           | CGGGCGTAGTTGAAGG | AAACTGATTCCAGAATTGAAGAACAAGTTAAA | A   | TCTGTGCAGA |     |     |
| C321deltaA        | CGGGCGTAGTTGAAGG | AAACTGATTCCAGAATTGAAGAACAAGTTAAA | A   | TCTGTGCAGA |     |     |
| Wxxxxx20          | CGGGCGTAGTTGAAGG | AAACTGATTCCAGAATTGAAGAACAAGTTAAA | A   | TCTGTGCAGA |     |     |
| KO11FL            | CGGGCGTAGTTGAAGG | AAACTGATTCCAGAATTGAAGAACAAGTTAAA | A   | TCTGTGCAGA |     |     |
| LY180x19          | CGGGCGTAGTTGAAGG | AAACTGATTCCAGAATTGAAGAACAAGTTAAA | A   | TCTGTGCAGA |     |     |
| E24377A           | CGGGCGTAGTTGAAGG | AAACTGATTCCAGAATTGAAGAACAAGTTAAA | A   | TCTGTGCAGA |     |     |
| SE11xx14          | CGGGCGTAGTTGAAGG | AAACTGATTCCAGAATTGAAGAACAAGTTAAA | A   | TCTGTGCAGA |     |     |
| 2009EL_2050       | CGGGCGTAGTTGAAGG | AAACTGATTCCAGAATTGAAGAACAAGTTAAA | A   | TCTGTGCAGA |     |     |
| 2011C_3493        | CGGGCGTAGTTGAAGG | AAACTGATTCCAGAATTGAAGAACAAGTTAAA | A   | TCTGTGCAGA |     |     |
| 55989x18          | CGGGCGTAGTTGAAGG | AAACTGATTCCAGAATTGAAGAACAAGTTAAA | A   | TCTGTGCAGA |     |     |
| IAI1xx13          | CGGGCGTAGTTGAAGG | AAACTGATTCCAGAATTGAAGAACAAGTTAAA | A   | TCTGTGCAGA |     |     |
| O103H2            | CGGGCGTAGTTGAAGG | AAACTGATTCCAGAATTGAAGAACAAGTTAAA | A   | TCTGTGCAGA |     |     |
| APECxx11          | CGGGCGTAGTTGAAGG | AAACTGATTCCAGAATTGAAGAACAAGTTAAA | A   | TCTGTGCAGA |     |     |
| UMNK88            | CGGGCGTAGTTGAAGG | AAACTGATTCCAGAATTGAAGAACAAGTTAAA | A   | TCTGTGCAGA |     |     |
| HSxxxx39          | CGGGCGTAGTTGAAGG | AAACTGATTCCAGAATTGAAGAACAAGTTAAA | A   | TCTGTGCAGA |     |     |
| BL21DE3           | CGGGCGTAGTTGAAGG | AAACTGATTCCAGAATTGAAGAACAAGTTAAA | A   | TCTGTGCAGA |     |     |
| REL606            | CGGGCGTAGTTGAAGG | AAACTGATTCCAGAATTGAAGAACAAGTTAAA | A   | TCTGTGCAGA |     |     |
| BL21_GoldDE3pLysS | CGGGCGTAGTTGAAGG | AAACTGATTCCAGAATTGAAGAACAAGTTAAA | A   | TCTGTGCAGA |     |     |
| ATCCxx37          | CGGGCGTAGTTGAAGG | AAACTGATTCCAGAATTGAAGAACAAGTTAAA | A   | TCTGTGCAGA |     |     |
| O111H             | CGGGCGTAGTTGAAGG | AAACTGATTCCAGAATTGAAGAACAAGTTAAA | A   | TCTGTGCAGA |     |     |
| O26H11            | CGGGCGTAGTTGAAGG | AAACTGATTCCAGAATTGAAGAACAAGTTAAA | A   | TCTGTGCAGA |     |     |
| UMN026            | CGGGCGTAGTTGAAGG | AAACTGATTCCAGAATTGAAGAACAAGTTAAA | A   | TCTGTGCAGA |     |     |
| 042NC_0176261     | CGGGCGTAGTTGAAGG | AAACTGATTCCAGAATTGAAGAACAAGTTAAA | A   | TCTGTGCAGA |     |     |
| IAI39x23          | CGGGCGTAGTTGAAGG | AAACTGATTCCAGAATTGAAGAACAAGTTAAA | A   | TCTGTGCAGA |     |     |
| O7K1xx29          | CGGGCGTAGTTGAAGG | AAACTGATTCCAGAATTGAAGAACAAGTTAAA | A   | TCTGTGCAGA |     |     |
| SMS_3_5           | CGGGCGTAGTTGAAGG | AAACTGATTCCAGAATTGAAGAACAAGTTAAA | A   | TCTGTGCAGA |     |     |
| RM12579           | CGGGCGTAGTTGAAGG | AAACTGATTCCAGAATTGAAGAACAAGTTAAA | A   | TCTGTGCAGA |     |     |
| CB9615            | CGGGCGTAGTTGAAGG | AAACTGATTCCAGAATTGAAGAACAAGTTAAA | A   | TCTGTGCAGA |     |     |
| Xuzhou21          | CGGGCGTAGTTGAAGG | AAACTGATTCCAGAATTGAAGAACAAGTTAAA | A   | TCTGTGCAGA |     |     |
| TW14359           | CGGGCGTAGTTGAAGG | AAACTGATTCCAGAATTGAAGAACAAGTTAAA | A   | TCTGTGCAGA |     |     |
| EC4115            | CGGGCGTAGTTGAAGG | AAACTGATTCCAGAATTGAAGAACAAGTTAAA | A   | TCTGTGCAGA |     |     |
| EDL933            | CGGGCGTAGTTGAAGG | AAACTGATTCCAGAATTGAAGAACAAGTTAAA | A   | TCTGTGCAGA |     |     |
| Sakaix28          | CGGGCGTAGTTGAAGG | AAACTGATTCCAGAATTGAAGAACAAGTTAAA | A   | TCTGTGCAGA |     |     |
| Prim.cons.        | CGGGCGTAGTTGAAGG | AAACTGATTCCAGAATTGAAGAACAAGTTAAA | A   | TCTGTGCAGA |     |     |

|               | 970                                                          | 980 | 990 | 1000 | 1010 | 1020 |
|---------------|--------------------------------------------------------------|-----|-----|------|------|------|
|               |                                                              |     |     |      |      |      |
| MG1655        | ATTTCTTTACCACCCTGTCTAACACGGTTAAACAAGCGAATAAAGATATCGATGCCGCCA |     |     |      |      |      |
| MDS42x1       | ATTTCTTTACCACCCTGTCTAACACGGTTAAACAAGCGAATAAAGATATCGATGCCGCCA |     |     |      |      |      |
| W3110x2       | ATTTCTTTACCACCCTGTCTAACACGGTTAAACAAGCGAATAAAGATATCGATGCCGCCA |     |     |      |      |      |
| DH1NC_0176381 | ATTTCTTTACCACCCTGTCTAACACGGTTAAACAAGCGAATAAAGATATCGATGCCGCCA |     |     |      |      |      |
| ETECxx4       | ATTTCTTTACCACCCTGTCTAACACGGTTAAACAAGCGAATAAAGATATCGATGCCGCCA |     |     |      |      |      |
| P12bxx5       | ATTTCTTTACCACCCTGTCTAACACGGTTAAACAAGCGAATAAAGATATCGATGCCGCCA |     |     |      |      |      |
| BW2952        | ATTTCTTTACCACCCTGTCTAACACGGTTAAACAAGCGAATAAAGATATCGATGCCGCCA |     |     |      |      |      |
| DH10Bx7       | ATTTCTTTACCACCCTGTCTAACACGGTTAAACAAGCGAATAAAGATATCGATGCCGCCA |     |     |      |      |      |
| C321deltaA    | ATTTCTTTACCACCCTGTCTAACACGGTTAAACAAGCGAATAAAGATATCGATGCCGCCA |     |     |      |      |      |
| Wxxxxx20      | ATTTCTTTACCACCCTGTCTAACACGGTTAAACAAGCGAATAAAGATATCGATGCCGCCA |     |     |      |      |      |
| KO11FL        | ATTTCTTTACCACCCTGTCTAACACGGTTAAACAAGCGAATAAAGATATCGATGCCGCCA |     |     |      |      |      |
| LY180x19      | ATTTCTTTACCACCCTGTCTAACACGGTTAAACAAGCGAATAAAGATATCGATGCCGCCA |     |     |      |      |      |
| E24377A       | ATTTCTTTACCACCCTGTCTAACACGGTTAAACAAGCGAATAAAGATATCGATGCCGCCA |     |     |      |      |      |
| SE11xx14      | ATTTCTTTACCACCCTGTCTAACACGGTTAAACAAGCGAATAAAGATATCGATGCCGCCA |     |     |      |      |      |
| 2009EL_2050   | ATTTCTTTACCACCCTGTCTAACACGGTTAAACAAGCGAATAAAGATATCGATGCCGCCA |     |     |      |      |      |
| 2011C_3493    | ATTTCTTTACCACCCTGTCTAACACGGTTAAACAAGCGAATAAAGATATCGATGCCGCCA |     |     |      |      |      |
| 55989x18      | ATTTCTTTACCACCCTGTCTAACACGGTTAAACAAGCGAATAAAGATATCGATGCCGCCA |     |     |      |      |      |
| IAI1xx13      | ATTTCTTTACCACCCTGTCTAACACGGTTAAACAAGCGAATAAAGATATCGATGCCGCCA |     |     |      |      |      |
| O103H2        | ATTTCTTTACCACCCTGTCTAACACGGTTAAACAAGCGAATAAAGATATCGATGCCGCCA |     |     |      |      |      |
| APECxx11      | ATTTCTTTACCACCCTGTCTAACACGGTTAAACAAGCGAATAAAGATATCGATGCCGCCA |     |     |      |      |      |
| UMNK88        | ATTTCTTTACCACCCTGTCTAACACGGTTAAACAAGCGAATAAAGATATCGATGCCGCCA |     |     |      |      |      |



|                   | 1090                                                         | 1100 | 1110 | 1120 | 1130 | 1140 |
|-------------------|--------------------------------------------------------------|------|------|------|------|------|
|                   |                                                              |      |      |      |      |      |
| MG1655            | CCAGATTCTACGTTGATTATGATGATTTAATGCTTTCTTTGCTAAAAGAAGCGGCCAAAA |      |      |      |      |      |
| MDS42x1           | CCAGATTCTACGTTGATTATGATGATTTAATGCTTTCTTTGCTAAAAGAAGCGGCCAAAA |      |      |      |      |      |
| W3110x2           | CCAGATTCTACGTTGATTATGATGATTTAATGCTTTCTTTGCTAAAAGAAGCGGCCAAAA |      |      |      |      |      |
| DH1NC_0176381     | CCAGATTCTACGTTGATTATGATGATTTAATGCTTTCTTTGCTAAAAGAAGCGGCCAAAA |      |      |      |      |      |
| ETECxx4           | CCAGATTCTACGTTGATTATGATGATTTAATGCTTTCTTTGCTAAAAGAAGCGGCCAAAA |      |      |      |      |      |
| P12bxx5           | CCAGATTCTACGTTGATTATGATGATTTAATGCTTTCTTTGCTAAAAGAAGCGGCCAAAA |      |      |      |      |      |
| BW2952            | CCAGATTCTACGTTGATTATGATGATTTAATGCTTTCTTTGCTAAAAGAAGCGGCCAAAA |      |      |      |      |      |
| DH10Bx7           | CCAGATTCTACGTTGATTATGATGATTTAATGCTTTCTTTGCTAAAAGAAGCGGCCAAAA |      |      |      |      |      |
| C321deltaA        | CCAGATTCTACGTTGATTATGATGATTTAATGCTTTCTTTGCTAAAAGAAGCGGCCAAAA |      |      |      |      |      |
| Wxxxxx20          | CCAGATTCTATGTTGATTATGATGATTTAATGCTTTCTTTGCTAAAAGAAGCGGCCAAAA |      |      |      |      |      |
| KO11FL            | CCAGATTCTATGTTGATTATGATGATTTAATGCTTTCTTTGCTAAAAGAAGCGGCCAAAA |      |      |      |      |      |
| LY180x19          | CCAGATTCTATGTTGATTATGATGATTTAATGCTTTCTTTGCTAAAAGAAGCGGCCAAAA |      |      |      |      |      |
| E24377A           | CCAGATTCTATGTTGATTATGATGATTTAATGCTTTCTTTGCTAAAAGAAGCGGCCAAAA |      |      |      |      |      |
| SE11xx14          | CCAGATTCTATGTTGATTATGATGATTTAATGCTTTCTTTGCTAAAAGAAGCGGCCAAAA |      |      |      |      |      |
| 2009EL_2050       | CCAGATTCTATGTTGATTATGATGATTTAATGCTTTCTTTGCTAAAAGAAGCGGCCAAAA |      |      |      |      |      |
| 2011C_3493        | CCAGATTCTATGTTGATTATGATGATTTAATGCTTTCTTTGCTAAAAGAAGCGGCCAAAA |      |      |      |      |      |
| 55989x18          | CCAGATTCTATGTTGATTATGATGATTTAATGCTTTCTTTGCTAAAAGAAGCGGCCAAAA |      |      |      |      |      |
| IAI1xx13          | CCAGATTCTATGTTGATTATGATGATTTAATGCTTTCTTTGCTAAAAGAAGCGGCCAAAA |      |      |      |      |      |
| O103H2            | CCAGATTCTATGTTGATTATGATGATTTAATGCTTTCTTTGCTAAAAGAAGCGGCCAAAA |      |      |      |      |      |
| APECxx11          | CCAGATTCTATGTTGATTATGATGATTTAATGCTTTCTTTGCTAAAAGAAGCGGCCAAAA |      |      |      |      |      |
| UMNK88            | CCAGATTCTATGTTGATTATGATGATTTAATGCTTTCTTTGCTAAAAGAAGCGGCCAAAA |      |      |      |      |      |
| HSxxxx39          | CCAGATTCTATGTTGATTATGATGATTTAATGCTTTCTTTGCTAAAAGAAGCGGCCAAAA |      |      |      |      |      |
| BL21DE3           | CCAGATTCTATGTTGATTATGATGATTTAATGCTTTCTTTGCTAAAAGAAGCGGCCAAAA |      |      |      |      |      |
| REL606            | CCAGATTCTATGTTGATTATGATGATTTAATGCTTTCTTTGCTAAAAGAAGCGGCCAAAA |      |      |      |      |      |
| BL21_GoldDE3pLysS | CCAGATTCTATGTTGATTATGATGATTTAATGCTTTCTTTGCTAAAAGAAGCGGCCAAAA |      |      |      |      |      |
| ATCCxx37          | CCAGATTCTATGTTGATTATGATGATTTAATGCTTTCTTTGCTAAAAGAAGCGGCCAAAA |      |      |      |      |      |
| O111H             | CCAGATTCTATGTTGATTATGATGATTTAATGCTTTCTTTGCTAAAAGAAGCGGCCAAAA |      |      |      |      |      |
| O26H11            | CCAGATTCTATGTTGATTATGATGATTTAATGCTTTCTTTGCTAAAAGAAGCGGCCAAAA |      |      |      |      |      |
| UMN026            | CCAGATTCTACGTTGATTATGATGATTTAATGCTTTCTTTGCTAAAAGAAGCGGCCAAAA |      |      |      |      |      |
| 042NC_0176261     | CCAGATTCTACGTTGATTATGATGATTTAATGCTTTCTTTGCTAAAAGAAGCGGCCAAAA |      |      |      |      |      |
| IAI39x23          | CCAGATTCTATGTTGATTATGATGATTTAATGCTTTCTTTGCTAAAAGAAGCGGCCAAAA |      |      |      |      |      |
| O7K1xx29          | CCAGATTCTATGTTGATTATGATGATTTAATGCTTTCTTTGCTAAAAGAAGCGGCCAAAA |      |      |      |      |      |
| SMS_3_5           | CCAGATTCTACGTTGATTATGATGATTTAATGCTTTCTTTGCTAAAAGAAGCGGCCAAAA |      |      |      |      |      |
| RM12579           | CCAGATTCTATGTTGATTATGATGATTTAATGCTTTCTTTGCTAAAAGAAGCGGCCAATA |      |      |      |      |      |
| CB9615            | CCAGATTCTATGTTGATTATGATGATTTAATGCTTTCTTTGCTAAAAGAAGCGGCCAATA |      |      |      |      |      |
| Xuzhou21          | CCAGATTCTATGTTGATTATGATGATTTAATGCTTTCTTTGCTAAAAGAAGCGGCCAATA |      |      |      |      |      |
| TW14359           | CCAGATTCTATGTTGATTATGATGATTTAATGCTTTCTTTGCTAAAAGAAGCGGCCAATA |      |      |      |      |      |
| EC4115            | CCAGATTCTATGTTGATTATGATGATTTAATGCTTTCTTTGCTAAAAGAAGCGGCCAATA |      |      |      |      |      |
| EDL933            | CCAGATTCTATGTTGATTATGATGATTTAATGCTTTCTTTGCTAAAAGAAGCGGCCAATA |      |      |      |      |      |
| Sakaix28          | CCAGATTCTATGTTGATTATGATGATTTAATGCTTTCTTTGCTAAAAGAAGCGGCCAATA |      |      |      |      |      |
|                   | ***** **                                                     |      |      |      |      |      |
| Prim.cons.        | CCAGATTCTATGTTGATTATGATGATTTAATGCTTTCTTTGCTAAAAGAAGCGGCCAAAA |      |      |      |      |      |

|               | 1150                                                        | 1160 | 1170 | 1180 | 1190 | 1200 |
|---------------|-------------------------------------------------------------|------|------|------|------|------|
|               |                                                             |      |      |      |      |      |
| MG1655        | AAA-TGATTAACACCTGTAATGAGTATCAGAAAAGACACGGTAAAAGACACTCTTTGAG |      |      |      |      |      |
| MDS42x1       | AAA-TGATTAACACCTGTAATGAGTATCAGAAAAGACACGGTAAAAGACACTCTTTGAG |      |      |      |      |      |
| W3110x2       | AAA-TGATTAACACCTGTAATGAGTATCAGAAAAGACACGGTAAAAGACACTCTTTGAG |      |      |      |      |      |
| DH1NC_0176381 | AAA-TGATTAACACCTGTAATGAGTATCAGAAAAGACACGGTAAAAGACACTCTTTGAG |      |      |      |      |      |
| ETECxx4       | AAA-TGATTAACACCTGTAATGAGTATCAGAAAAGACACGGTAAAAGACACTCTTTGAG |      |      |      |      |      |
| P12bxx5       | AAA-TGATTAACACCTGTAATGAGTATCAGAAAAGACACGGTAAAAGACACTCTTTGAG |      |      |      |      |      |
| BW2952        | AAA-TGATTAACACCTGTAATGAGTATCAGAAAAGACACGGTAAAAGACACTCTTTGAG |      |      |      |      |      |
| DH10Bx7       | AAA-TGATTAACACCTGTAATGAGTATCAGAAAAGACACGGTAAAAGACACTCTTTGAG |      |      |      |      |      |
| C321deltaA    | AAA-TGATTAACACCTGTAATGAGTATCAGAAAAGACACGGTAAAAGACACTCTTTGAG |      |      |      |      |      |
| Wxxxxx20      | AAA-TGATTAACACCTGTAATGAGTATCAGAAAAGACACGGTAAAAGACACTCTTTGAG |      |      |      |      |      |
| KO11FL        | AAA-TGATTAACACCTGTAATGAGTATCAGAAAAGACACGGTAAAAGACACTCTTTGAG |      |      |      |      |      |
| LY180x19      | AAA-TGATTAACACCTGTAATGAGTATCAGAAAAGACACGGTAAAAGACACTCTTTGAG |      |      |      |      |      |
| E24377A       | AAA-TGATTAACACCTGTAATGAGTATCAGAAAAGACACGGTAAAAGACACTCTTTGAG |      |      |      |      |      |
| SE11xx14      | AAA-TGATTAACACCTGTAATGAGTATCAGAAAAGACACGGTAAAAGACACTCTTTGAG |      |      |      |      |      |
| 2009EL_2050   | AAA-TGATTAACACCTGTAATGAGTATCAGAAAAGACACGGTAAAAGACACTCTTTGAG |      |      |      |      |      |
| 2011C_3493    | AAA-TGATTAACACCTGTAATGAGTATCAGAAAAGACACGGTAAAAGACACTCTTTGAG |      |      |      |      |      |
| 55989x18      | AAA-TGATTAACACCTGTAATGAGTATCAGAAAAGACACGGTAAAAGACACTCTTTGAG |      |      |      |      |      |
| IAI1xx13      | AAA-TGATTAACACCTGTAATGAGTATCAGAAAAGACACGGTAAAAGACACTCTTTGAG |      |      |      |      |      |
| O103H2        | AAA-TGATTAACACCTGTAATGAGTATCAGAAAAGACACGGTAAAAGACACTCTTTGAG |      |      |      |      |      |
| APECxx11      | AAA-TGATTAACACCTGTAATGAGTATCAGAAAAGACACGGTAAAAGACACTCTTTGAG |      |      |      |      |      |
| UMNK88        | AAA-TGATTAACACCTGTAATGAGTATCAGAAAAGACACGGTAAAAGACACTCTTTGAG |      |      |      |      |      |

|                   |                                                               |
|-------------------|---------------------------------------------------------------|
| HSxxxx39          | AAA-TGATTAACACCTGTAATGAGTATCAGAAAAGACACGGTAAAAGACACTCTTTGAG   |
| BL21DE3           | AAA-TGATTAACACCTGTAATGAGTATCAGAAAAGACACGGTAAAAGACACTCTTTGAG   |
| REL606            | AAA-TGATTAACACCTGTAATGAGTATCAGAAAAGACACGGTAAAAGACACTCTTTGAG   |
| BL21_GoldDE3pLysS | AAA-TGATTAACACCTGTAATGAGTATCAGAAAAGACACGGTAAAAGACACTCTTTGAG   |
| ATCCxx37          | AAA-TGATTAACACCTGTAATGAGTATCAGAAAAGACACGGTAAAAGACACTCTTTGAG   |
| O111H_            | AAA-TGATTAACACCTGTAATGAGTATCAGAAAAGACACGGTAAAAGACACTCTTTGAG   |
| O26H11            | AAA-TGATTAACACCTGTAATGAGTATCAGAAAAGACACGGTAAAAGACACTCTTTGAG   |
| UMN026            | AAA-TGATTAACACCTGTAATGAGTATCAGAAAAGACACGGTAAAGAAGACACTCTTTGAG |
| 042NC_0176261     | AAA-TGATTAACACCTGTAATGAGTATCAGAAAAGACACGGTAAAGAAGACACTCTTTGAG |
| IAI39x23          | AAA-TGATTAACACCTGTAATGAGTATCAGAAAAGACACGGTAAAGAAGACACTCTTTGAG |
| O7K1xx29          | AAAATGATTAACACCTGTAATGAGTATCAGAAAAGACACGGTAAAGAAGACACTCTTTGAG |
| SMS_3_5           | AAA-TGATTAACACCTGTAATGAGTATCAGAAAAGACACGGTAAAGAAGACACTCTTTGAG |
| RM12579           | AAA-TGATTAACACCTGTAATGAGTATCAGAAAAGACACGGTAAAGAAGACACTCTTTGAG |
| CB9615            | AAA-TGATTAACACCTGTAATGAGTATCAGAAAAGACACGGTAAAGAAGACACTCTTTGAG |
| Xuzhou21          | AAA-TGATTAACACCTGTAATGAGTATCAGAAAAGACACGGTAAAGAAGACACTCTTTGAG |
| TW14359           | AAA-TGATTAACACCTGTAATGAGTATCAGAAAAGACACGGTAAAGAAGACACTCTTTGAG |
| EC4115            | AAA-TGATTAACACCTGTAATGAGTATCAGAAAAGACACGGTAAAGAAGACACTCTTTGAG |
| EDL933            | AAA-TGATTAACACCTGTAATGAGTATCAGAAAAGACACGGTAAAGAAGACACTCTTTGAG |
| Sakaix28          | AAA-TGATTAACACCTGTAATGAGTATCAGAAAAGACACGGTAAAGAAGACACTCTTTGAG |
|                   | *** *****                                                     |
| Prim.cons.        | AAAATGATTAACACCTGTAATGAGTATCAGAAAAGACACGGTAAAAGACACTCTTTGAG   |

1210

|                   |                 |              |
|-------------------|-----------------|--------------|
|                   |                 |              |
| MG1655            | GTACCTGAAGTCTGA | .... 1230694 |
| MDS42x1           | GTACCTGAAGTCTGA |              |
| W3110x2           | GTACCTGAAGTCTGA |              |
| DH1NC_0176381     | GTACCTGAAGTCTGA |              |
| ETECxx4           | GTACCTGAAGTCTGA |              |
| P12bxx5           | GTACCTGAAGTCTGA |              |
| BW2952            | GTACCTGAAGTCTGA |              |
| DH10Bx7           | GTACCTGAAGTCTGA |              |
| C321deltaA        | GTACCTGAAGTCTGA |              |
| Wxxxxx20          | GTACCTGAAGTCTGA |              |
| KO11FL            | GTACCTGAAGTCTGA |              |
| LY180x19          | GTACCTGAAGTCTGA |              |
| E24377A           | GTACCTGAAGTCTGA |              |
| SE11xx14          | GTACCTGAAGTCTGA |              |
| 2009EL_2050       | GTACCTGAAGTCTGA |              |
| 2011C_3493        | GTACCTGAAGTCTGA |              |
| 55989x18          | GTACCTGAAGTCTGA |              |
| IAI1xx13          | GTACCTGAAGTCTGA |              |
| O103H2            | GTACCTGAAGTCTGA |              |
| APECxx11          | GTACCTGAAGTCTGA |              |
| UMNK88            | GTACCTGAAGTCTGA |              |
| HSxxxx39          | GTACCTGAAGTCTGA |              |
| BL21DE3           | GTACCTGAAGTCTGA |              |
| REL606            | GTACCTGAAGTCTGA |              |
| BL21_GoldDE3pLysS | GTACCTGAAGTCTGA |              |
| ATCCxx37          | GTACCTGAAGTCTGA |              |
| O111H_            | GTACCTGAAGTCTGA |              |
| O26H11            | GTACCTGAAGTCTGA |              |
| UMN026            | GTACCTGAAGTCTGA |              |
| 042NC_0176261     | GTACCTGAAGTCTGA |              |
| IAI39x23          | GTACCTGAAGTCTGA |              |
| O7K1xx29          | GTACCTGAAGTCTGA |              |
| SMS_3_5           | GTACCTGAAGTCTGA |              |
| RM12579           | GTACCTGAAGTCTGA |              |
| CB9615            | GTACCTGAAGTCTGA |              |
| Xuzhou21          | GTACCTGAAGTCTGA |              |
| TW14359           | GTACCTGAAGTCTGA |              |
| EC4115            | GTACCTGAAGTCTGA |              |
| EDL933            | GTACCTGAAGTCTGA |              |
| Sakaix28          | GTACCTGAAGTCTGA |              |
|                   | *****           |              |
| Prim.cons.        | GTACCTGAAGTCTGA |              |

## Figure S1:

The open access soft ware programs

BLAST: (<http://blast.ncbi.nlm.nih.gov/Blast.cgi>) to search for sequence and strains with similarities to the *clyA/hlyE* gene, and

ClustalW: ( <http://pbil.ibcp.fr/htm/index.php>) were used for alignment of the sequences with the *clyA* gene sequences of *E. coli* strain MG1655 (accession number of NC\_000913.3) as the reference sequence. It includes the 1.2 kb region between nucleotide coordinates 1229483 and 1230694 and represents the entire *clyA* coding sequence and 300 base pairs upstream of the ATG start codon. The sequence of *clyA* was compared with the corresponding sequences of *clyA* in other *E. coli* strains (both IPEC and ExPEC).

Black nucleotide lettering and dashes indicates position where there are differences in the otherwise red letter compilation.

The translational start sequences (ATG and ribosome binding motif) are marked in green.

The transcriptional start sequences -35 and -10 motifs and the initiating nucleotide are marked in blue.

The binding site for the CRP/FNR regulators is marked in grey.

The binding sequences for SlyA are underlined.
