# Supplementary material for: Elevated recombinant clyA gene expression in the uropathogenic Escherichia coli strain 536, a clue to explain pathoadaptive mutations in a subset of extraintestinal E. coli strains
Source: PubMed Central journal article supplement (PMC4164713; doi:10.1186/s12866-014-0216-4), 2014-09-02
Supplement: 12866_2014_216_MOESM2_ESM.pdf [file 12866_2014_216_MOESM2_ESM.pdf]

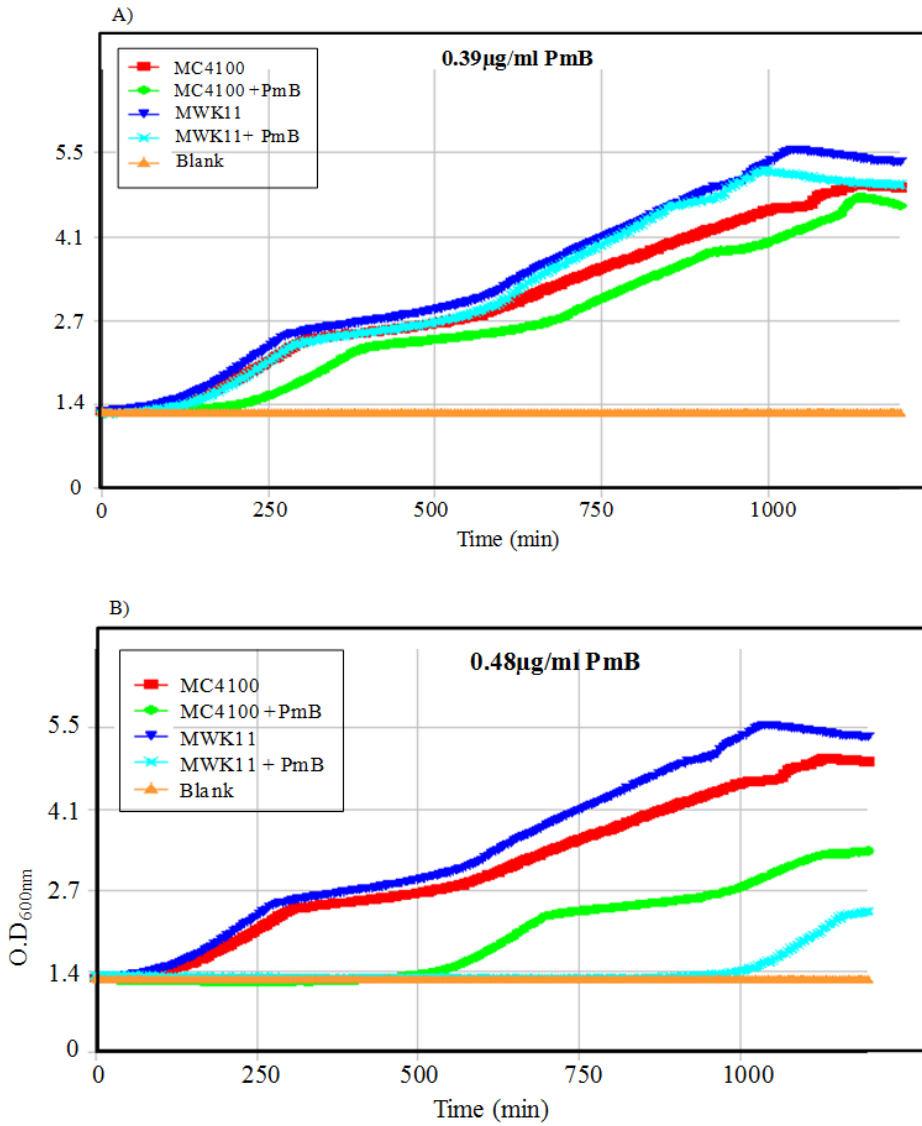

**Figure S2:**

Effect of Polymyxin B on the growth of *E. coli* K-12 derivatives MC4100 and MWK11 in batch cultures of medium AUM at 37°C.
